1 **CASUAL SEX AMONG MSM DURING THE PERIOD OF SHELTERING IN PLACE**  
2 **TO PREVENT THE SPREAD OF COVID-19: RESULTS OF NATIONAL ONLINE**  
3 **SURVEYS IN BRAZIL AND PORTUGAL**

4  
5 Alvaro Francisco Lopes de Sousa, PhD<sup>1,2</sup>, Layze Braz de Oliveira, PhD student<sup>1</sup>, Artur Acelino  
6 Francisco Luz Nunes Queiroz PhD student<sup>1</sup>, Hérica Emilia Felix de Carvalho PhD student<sup>1</sup>,  
7 Guilherme Schneider PhD student<sup>1</sup>, Emerson Lucas Silva Camargo PhD student<sup>1</sup>; Telma  
8 Evangelista de Araujo PhD<sup>3</sup>, Sandra Brignol PhD<sup>4</sup>, Isabel Amélia Costa Mendes PhD<sup>1</sup>, Willi  
9 McFarland PhD<sup>5</sup>, Inês Fronteira PhD<sup>2</sup>.

10 **Affiliations:**

11 1. Human Exposome and Infectious Diseases Network, Escola de Enfermagem de Ribeirão  
12 Preto, Universidade de São Paulo, Brazil.

13 2. Global Health and Tropical Medicine, Instituto de Higiene e Medicina Tropical, Universidade  
14 Nova de Lisboa, Portugal.

15 3. Universidade Federal do Piauí, Brazil.

16 4. Department of Collective Health, Universidade Federal Fluminense, Brazil.

17 5. Department of Epidemiology and Biostatistics, University of California at San Francisco,  
18 USA.

19 **Funding:** Conselho Nacional de Pesquisa – CNPq, Brazil.

20 **Authors' contributions:**

21 Conception, planning, analysis, interpretation and writing of the work: AFLS, AAFLNQ, LBO;  
22 TMEA; IF. Conception, planning, analysis and interpretation and writing: SB, TMEA, IACM;  
23 HEFC; GS; ELSC; WM. All authors approved the final version.

24 **Conflict of Interest:** All authors declare no conflict of interest.

25 **Short Summary:** The pandemic of COVID-19 did not cause changes in the sexual behavior of  
26 MSM; they continued to engage in casual sex, using drugs, having multiple partners and  
27 adopting ineffective protective measures for COVID-19.

## 28 **ABSTRACT**

29 **Background:** We investigated the extent to which Brazilian and Portuguese MSM had casual  
30 sexual relations outside their homes during the period of sheltering in place for the COVID-19  
31 pandemic.

32 **Methods:** An online survey was implemented in Brazil and Portugal in April, during the period  
33 of social isolation for COVID-19, with a sample of 2,361 MSMs. Recruitment was done through  
34 meeting apps and Facebook.

35 **Results:** Most of the sample (53.0%; considering 53.1% in Portugal and 53% in Brazil) had  
36 casual sex partners during sheltering. Factors that increased the odds of engaging in casual sex in  
37 Brazil were having group sex (aOR 2.1, 95%CI 1.3-3.4), living in a urban area (aOR 1.6, 95%CI  
38 1.1-2.2), feeling that sheltering had high impact on daily life (aOR 3.0, 95%CI 1.1-8.3), having  
39 casual instead of steady partners (aOR 2.5, 95%CI 1.8-3.5), and not decreasing the number of  
40 partners (aOR 6.5, 95%CI 4.2-10.0). In Portugal, the odds of engaging in casual sex increased  
41 with using Facebook to find partners (aOR 4.6, 95%CI 3.0-7.2), not decreasing the number of  
42 partners (aOR 3.8, 95%CI 2.9-5.9), usually finding partners in physical venues (pre-COVID-19)  
43 (aOR 5.4, 95%CI 3.2–8.9), feeling that the isolation had high impact on daily life (aOR 3.0,  
44 95%CI 1.3-6.7), and HIV-positive serostatus (aOR 11.7, 95%CI 4.7-29.2). Taking PrEP/Truvada  
45 to prevent COVID-19 was reported by 12.7% of MSM.

46 **Conclusions:** The pandemic has not stopped most of our MSM sample from finding sexual  
47 partners, with high risk sexual behaviors continuing. Public health messages for the prevention  
48 of COVID-19 need to be crafted to explicitly address sexual behavior to reduce contamination in  
49 the current moment.

50 **Keywords:** Casual sex; Sex partners; MSM; SARS-CoV-2; COVID-19.

## 51 **Background**

52 By September 01, 2020, Brazil was still one of the most affected countries by the  
53 COVID-19 pandemic. With 121,381 deaths and 3,908,272 cases of COVID-19 officially  
54 confirmed [1] and an incidence rate (per 100,000 population) of 1837.9; Brazil ranked in the  
55 second position in the world [2]. Portugal, where the infection started spreading nearly one  
56 month before Brazil, had 58,243 confirmed cases and 1,824 deaths by COVID-19 by the same  
57 date [3], and an incidence rate (per 100,000 population) of 573.5.

58 Without a vaccine or effective treatment, general preventive measures for respiratory  
59 infections remain the main form of containing the spread of the virus. Minimizing the gathering  
60 and movement of people, that is, “sheltering in place” to varying degrees of strictness have been  
61 adopted by many countries, including Brazil and Portugal [4,5]. There appears to be positive  
62 effects of sheltering on reducing the speed of COVID-19 infection. However, other aspects of  
63 health, including mental and sexual health, may be suffering [6].

64 Social support is a known protective factor for general health, especially for LGBT  
65 communities that have historically been victims of social exclusion. Social withdrawal can  
66 trigger harmful consequences for mental and physical health. In populations where this support is  
67 more fragile, as in the case of LGBT populations, interruptions in social support can have severe

68 negative consequences, including greater risk of exposure to COVID-19, as the disease is still  
69 not fully understood [6].

70 To measure the potential consequences of COVID-19 on the sexual behavior of MSM,  
71 the In\_PrEP Group in Brazil and Portugal implemented an online questionnaire. In particular, the  
72 questionnaire sought to measure whether MSM were seeking casual partners during the period  
73 when shelter in place directives were in effect and which measures they were undertaking to  
74 reduce the risk of COVID-19, as well as HIV and other STIs. Brazil and Portugal were selected  
75 as they share a language and a large flow of people between these countries each year (28,210)  
76 [8], through immigration, professional and academic activities, and tourism [9].

77

## 78 **Methods**

### 79 **Study design, population, sampling, and recruitment**

80 This project entitled “40tena” is derived from the In\_PrEP cohort study, a multicenter survey  
81 started in 2020, which carries out behavioral follow up of MSM, implemented in all 26 Brazilian  
82 states and the Federal District, and in 15 of the 18 districts of Portugal. Due to the COVID-19  
83 pandemic, some questions were added to assess sexual behavior during the sheltering-in-place  
84 period. The research project and the presentation of these manuscripts were guided by the  
85 STROBE tool and The Checklist for Reporting Results of Internet E-Surveys (CHERRIES).

86 A rapid and dynamic data collection process took place in April 2020 at a time when the two  
87 countries were under sheltering directives. In both countries, the directives of the official health  
88 agencies asked the inhabitants to “shelter in place”, avoiding close contact with people outside  
89 their place of shelter as much as possible. Essential activities such as trade and some services  
90 were maintained, but with restrictions.

91 In total, 2,361 MSM participated in the research, out of which 1,651 (69.9%) were from  
92 Brazil and 710 (30.1%) from Portugal. The research participants were recruited by an adaptation  
93 of the Respondent Drive Sampling (RDS) method to the virtual environment, so that one  
94 participant was responsible for recruiting other individuals of the same category as his, using  
95 their networks. To meet the requirements of the method, we selected 15 MSM with different  
96 characteristics in relation to: location in the country (divided according to the regions of the two  
97 countries); race/skin color (Caucasian and non-Caucasian), age (young, adult, and older adult)  
98 and schooling level. These were the first participants and they were identified as seeds. Each  
99 participant received the link to the research website and was instructed to invite/disseminate to  
100 MSM of their social network, until obtaining a significant sample.

101 The seeds were identified by the two most popular [10] geolocation-based dating applications  
102 (Grindr and Hornet) by direct chat with online users, adapted to time location sampling (TLS)  
103 technique following previous methods [11-12] (Figure 01).

104 We also used the social network Facebook to boost the number of participants, directing to  
105 the MSM population aged between 18 and 60 years (age limit imposed by the social network),  
106 by a fixed post on the official search page (<https://www.facebook.com/taafimdeque/>) and it was  
107 followed by an electronic link, which provided access to the free and informed consent form and  
108 the survey questionnaire.

109 We included only individuals who identified themselves as men (cis or trans), aged 18 or  
110 over, and living in one of the two countries. Non-Portuguese speakers and tourists were  
111 excluded. For Facebook recruitment, the researchers used the boost feature to target MSM in  
112 both countries.

## 113 **Measures**

114 Data were collected by Computer-Assisted Technique Interview (CASI). The data collection  
115 questionnaire was hosted on the study site and, for security reasons, it only allowed one answer  
116 by IP (*internet protocol*), that is, only one user answered by machine (computer, cell phone ...).  
117 The research questionnaire was created and validated (face-content) by a group of three experts  
118 from both countries in two versions: European Portuguese (Portugal) and Brazilian Portuguese  
119 (Brazil). It was divided into four sections with 46 questions, mostly multiple choice, some of  
120 which were mandatory for completion of the questionnaire. The questions addressed:

- 121 1. Sociodemographic information (age; gender identity; schooling; race/skin color; sexual  
122 orientation; type of current relationship; country; state; place of dwelling);
- 123 2. Social welfare and coping in the period of social distancing;
- 124 3. Sexual practices and activities during the pandemic, namely: sexual practice with a casual  
125 partner; sex with use of drugs; threesome or group sex; sex without condom use; STIs protection  
126 strategies; sex frequency and protection measures against COVID-19; search for health services;
- 127 4. Sexual practices and activities in the period prior to the pandemic: Use of PrEP and PEP;  
128 commonly used ways to search for partners; knowledge about STIs and HIV testing;

129 For this study, we defined sex with a casual partner or simply casual sex, such as anal sex with a  
130 new or unknown partner outside the place where they were sheltered, with the question: “Since  
131 the social distancing/sheltering was proposed in your country, have you had sex with a new or  
132 unknown partner who is outside the place where you are sheltered, or have you left your shelter  
133 to meet that partner?.”

### 134 **Analysis**

135 Descriptive analysis was performed for key numerical and categorical variables. Bivariate and  
136 multivariable logistic regression was used to characterize associations with having casual sex.

137 We tested the multicollinearity between variables before moving on to the regression model. A  
138 final model was selected, using the forward conditional input method, based on retaining those  
139 variables with  $p < 0.1$  while using  $p < 0.05$  as the cut-off for significance. The best performance of  
140 the multivariate model with was considered for aspects of accuracy, sensitivity to specificity  
141 (Receiver Operating Characteristic - ROC) proving that the statistical performance developed  
142 was better than chance.

### 143 **Ethical considerations**

144 The research project obtained ethical approval from the Universidade Nova de Lisboa and  
145 Universidade de São Paulo. Informed consent was obtained from all users online, before  
146 proceeding with the questionnaire.

147

### 148 **Results**

149 A total of 2,361 MSM participated in the online surveys, including 1,651 (69.9%) from Brazil  
150 and 710 (30.1%) from Portugal (Table 1). Most participants had access to the survey from the  
151 indication by social networks partners or colleagues (72.7%), and Facebook was responsible  
152 for® the remaining 27.3%. The median age was 29 years (ranging from 18-66). Most men in  
153 both countries lived in urban areas (69.0% in Brazil, 95.4% in Portugal) and were single (69.2%  
154 in Brazil, 82.3% in Portugal). One in ten (9.9%) MSM respondents in Brazil self-reported their  
155 HIV status as positive, as did 12.1% of respondents in Portugal. In Brazil, 10.5% reported testing  
156 and 5.5% reported being diagnosed with COVID-19. In Portugal, 15.5% had tested and 1.8%  
157 were diagnosed with COVID-19.

158 Table 1 also describes how the COVID-19 epidemic changed the respondents' sexual behavior.  
159 Over half of respondents (n:1252/ 53.0%) had casual sex, considering that 47 (3.8%) engaged in

160 paid sex, group sex (27.3%), sex under the influence of alcohol or drugs (69.8%), and  
161 unprotected sex (47.1%).

162 Many MSM reported behaviors that they believed would reduce the risk of COVID-19  
163 transmission. Apart from measures taken with respect to sex, general preventive measures (e.g.,  
164 use of face mask until the meeting place and hand sanitizing with hand sanitizer) (25.8%), asking  
165 if the partner was sheltering (30.7%), and asking if the partner had symptoms (27.5%) were  
166 mentioned. Other measures to reduce the spread of COVID-19 included avoiding kissing during  
167 sex (16.2%), washing hands before and after sex (27.6%), and cleaning the place where they had  
168 sex before and after sex (14.6%). Notably, among the 652 users of PrEP / Truvada in this study  
169 almost half (301; 46.1%) also referred using this medicine as a preventive measure to the  
170 transmission of COVID-19.

171 Table 2 presents correlates of leaving the house or having someone in their house for  
172 casual sex during the sheltering period in bivariate and multivariable logistic regression models  
173 for each country. In Brazil, the odds of engaging in casual sex increased with the variables  
174 having group sex (adjusted odds ratio [aOR] 2.1, 95% CI 1.3-3.4), living in a urban area (aOR  
175 1.6, 95% CI 1.1-2.2), feeling that sheltering had average (aOR 2.2, 95% CI 1.5-3.2) or high  
176 impact on their daily life (aOR 3.0, 95% CI 1.1-8.3) compared to low impact, having casual  
177 partners (aOR 2.5, 95% CI 1.8-3.5), and not decreasing the number of partners during the  
178 COVID-19 epidemic (aOR 6.5, 95% CI 4.2-10.0). In Portugal, the odds of engaging in casual  
179 sex increased with the variables using Facebook to find partners (aOR 4.6, 95% CI 3.0-7.2), not  
180 decreasing the number of partners during the COVID-19 epidemic (aOR 3.8, 95% CI 2.9-5.9),  
181 usually finding partners in physical venues (pre-COVID-19) (aOR 5.4, 95% CI 3.2–8.9), feeling



182 that the isolation had high impact on their daily life (aOR 3.0, 95% CI 1.3-6.7), and reporting  
183 HIV-positive serostatus (aOR 11.7, 95% CI 4.7-29.2).

184

## 185 **Discussion**

186 Our study showed that the COVID-19 pandemic and the period of sheltering in place did not stop  
187 a considerable portion of Brazilian and Portuguese MSM from finding casual sexual partners.  
188 Nevertheless, over 95% of respondents say they adopted at least partial sheltering in place. For  
189 Brazil, this level may be higher than typically reported by local authorities for the general  
190 population (between 40% and 55%) [13]. These figures may be cause for concern regarding  
191 overcrowding hospitals [14]. For Portugal, compliance in the general population appears to have  
192 been high enough to avert overwhelming the hospital system [15]. Although slightly over half of  
193 MSM still found casual partners outside their homes, 75% had fewer partners compared to  
194 before the COVID-19 epidemic. MSM reported other measures to reduce the risk for COVID-19  
195 akin to other risk-reduction practices. For example, more than 25% asked if their partners were  
196 otherwise sheltering and if they had any symptoms of COVID-19. Although close contact was  
197 inherent or implied in having casual sex, many MSM reported avoiding kissing, handwashing  
198 before and after sex, and cleaning the place where they had sex before and after sex.

199 An unexpected finding was the use of PrEP/Truvada for COVID-19 prophylaxis. In the  
200 absence of evidence of efficacy for COVID-19 prevention, the assumption may lead to people on  
201 PrEP to neglect effective measures. A possible explanation for the adoption of this practice  
202 might be misunderstanding the discussion of potential of prophylaxis drugs for SARS-CoV2 in  
203 the popular media [16]. Some MSM may have mistaken Truvada, promoted for HIV

204 prophylaxis, as having a similar mechanism for SARS-CoV2. Specific messaging may be needed  
205 to dispel this false connection through programs promoting PrEP for HIV.

206 Our study also found continuing behaviors that may place the studied group at high risk  
207 for acquiring or transmitting HIV and other STIs during the COVID-19 epidemic, at levels  
208 similar to those reported in studies [10,17] slightly prior to the pandemic period. More than one  
209 in six MSM reported group sex, implying the meeting of several people in very close contact,  
210 thus amplifying potential COVID-9 exposure [18]. Engaging in group sex was further associated  
211 with increased odds of having casual partners among the group of Brazilian MSM. Sexual  
212 encounters under the influence of drugs or alcohol, also common during the sheltering period,  
213 can decrease reasoning capacity and hinder the adoption of preventive measures for HIV/STIs  
214 and COVID-19 [19]. Unprotected sex with a new casual partner was reported by over one in  
215 three Brazilian MSM and one in five Portuguese MSM during the shelter in place period. These  
216 have been considered high rates of incidence[12].

217 The duration of the sheltering period, with accompanying feelings of isolation, may  
218 partly explain the high-risk sexual behaviors. Most participants had been isolated for at least 30  
219 days, and many recognized a high impact of social isolation on their lives. This in turn may have  
220 led MSM to feel a greater need for social contact, to seek a “break” in isolation to seek partners  
221 [20], with an additional break for HIV preventive measures. This hypothesis is corroborated by  
222 the findings of the multivariable analysis, in which acknowledging high impact of the sheltering  
223 period was associated with seeking external casual sex partners in both in Brazil and in Portugal.  
224 The effect of a prolonged isolation period is particularly worrisome as Brazil moves towards  
225 becoming a COVID-19 epicenter in Latin America and the world [21].

226           Some studies imply that social isolation may lead to higher utilization of virtual networks  
227 to search for sexual encounters [6, 22]. Connections via the Tinder application increased 15% in  
228 the US and 25% in Italy and Spain during the COVID-19 epidemic [22]. The duration of chat  
229 activity also increased by 30% [22]. Notably, the use of Facebook as the preferable way to find  
230 partners before the pandemic was significantly associated with greater odds for Portuguese MSM  
231 having casual sex. Another hypothesis is that partnering through Facebook can provide a false  
232 sense of exposure control, as it enables sex with a friend, acquaintance or otherwise someone  
233 belonging to the same social network Yet another possible explanation for the association of  
234 increased casual partnering during COVID-19 and use of Facebook, not yet documented in the  
235 literature, may be fear of judgment (i.e., for breaking sheltering) by closer friends, which leads  
236 MSM to seek out like-minded strangers. On the other hand, social media can assist with keeping  
237 smaller social groups as well as in the adoption of practices such as virtual sex and masturbation  
238 [23, 24], which may reduce risks of transmissible infections.

239           Other significant associations with seeking casual sex during COVID-19 are notable.  
240 Being HIV positive also increased the odds of engaging in casual sex in Portuguese MSM.  
241 Although we recognize that even before the pandemic, studies indicated that MSM living with  
242 HIV already had high-risk sexual behavior[25,26], another hypothesis may be in the false sense  
243 of protection due to antiretrovirals for HIV currently being tested in COVID-19 patients [27].  
244 This may be consistent with assumptions or misunderstandings about PrEP, as mentioned above.

245           In both Brazil and in Portugal, living in an urban area increased the odds of casual sex,  
246 likely explained by an access to greater numbers of MSM [28]. This facilitates the location and  
247 selection of partners by dating applications or other social media [12].

248           This study has several limitations. First, we recognize the data derived from a  
249 convenience sample in both countries. Venue-based and peer-referral mechanisms to sample and  
250 recruit are harder to logistically accomplish during the COVID-19 epidemic. The site that hosts  
251 the form is not able to inform how many subjects were reached, only the amount of access and  
252 answers.

253           Secondly, we did not measure variables recognized as important in hindsight, such as  
254 exact number of days in sheltering, different sexual practices, and the organization of other  
255 events, such as parties where sex may have occurred. Lastly, we did not test for COVID-19 and  
256 therefore could not fully link behaviors directly to infection. Furthermore, most questions refer to  
257 past events that may be biased by memory.

## 258 **Conclusions**

259 We were able to identify a high frequency of casual sex among MSM, as well as associated  
260 factors that might increase exposure to SARS-CoV-2, HIV, and other STIs during a period of  
261 high COVID-19 transmission after implementation of sheltering in place. Although many  
262 strategies were adopted to minimize the exposure to SARS-CoV-2, the effectiveness of those  
263 measures is threatened by high-risk practices for both COVID-19 and HIV, including  
264 unprotected sexual intercourse and group sex. By analyzing two countries with different  
265 scenarios for control of COVID-19, we were able to demonstrate the vulnerability of MSM  
266 communities to the pandemic. Our results should be considered when making decisions about  
267 public health, since if these vulnerabilities are left unaddressed, they may hamper the response to  
268 the pandemic.

269

270

271 **References**

- 272 1. Ministério da Saúde (Brazil). Painel Coronavírus. 2020. Available at:  
273 <https://covid.saude.gov.br/>
- 274 2. WHO. Coronavirus disease (COVID-2019) situation reports. Available from:  
275 <https://www.who.int/emergencies/diseases/novel-coronavirus-2019/situation-reports>
- 276 3. Ministério da Saúde (Portugal). SNS-24. Temas da saúde - COVID-19. Available at:  
277 <https://www.sns24.gov.pt/tema/doencas-infecciosas/covid-19/>
- 278 4. Peixoto VR, Vieira A, Aguiar P, Sousa, Abrantes A. “Timing”, Adesão e Impacto das  
279 Medidas de Contenção da COVID-19 em Portugal. NOVA National School of Public Health  
280 report **2020**.
- 281 5. Albuquerque LP, Silva RB, Araújo RMS. COVID-19: origin, pathogenesis, transmission,  
282 clinical aspects and current therapeutic strategies. *Rev Pre Infec e Saúde*. **2020**; 6:10432.
- 283 6. Brennan DJ, Card KG, Collicot D, Jollimore J, Lachowsky NJ. How Might Social Distancing  
284 Impact Gay, Bisexual, Queer, Trans and Two-Spirit Men in Canada? *AIDS Behav* **2020**  
285 30:1–3.
- 286 7. McDonald K. Social Support and Mental Health in LGBTQ Adolescents: A review of the  
287 literature. *Issues Ment Health Nurs* **2018**; 39(1):16-29.
- 288 8. Portugal. Serviço de Estrangeiros e Fronteiras, 2018. Available at:  
289 <https://sefstat.sef.pt/Docs/Rifa2018.pdf>
- 290 9. Barbosa B, Santos CM, Santos M. Tourists with migrants’ eyes: the mediating role of  
291 tourism in international retirement migration. *J Tour Cult Chang* **2020**.

- 292 10. Queiroz AAFLN, Matos MCB, Araújo TME, Reis RK, Sousa AFL. Sexually transmitted  
293 infections and factors associated with condom use in dating app users in Brazil. *Acta paul  
294 enferm.* **2019**;32(5):546-53.
- 295 11. Queiroz AAFLN, Sousa AFL, Matos MCB, et al. Factors associated with self-reported non-  
296 completion of the hepatitis B vaccine series in men who have sex with men in Brazil. *BMC  
297 Infect Dis* **2019**;19(1):335.
- 298 12. Queiroz AAFLN, Sousa AFL, Brignol S, Araújo TME, Reis RK. Vulnerability to HIV  
299 among older men who have sex with men users of dating apps in Brazil. *Braz J Infect Dis*  
300 **2019**; 23(5): 298-306.
- 301 13. Lana RM, Coelho FC, Gomes MFC, Cruz OG, Bastos LS, Villela DAM et al. The novel  
302 coronavirus (SARS-CoV-2) emergency and the role of timely and effective national health  
303 surveillance. *Cad Saúde Pública* **2020**; 36 (3): e00019620.
- 304 14. Freitas ARR, Napimoga M, Donalisio MR. Assessing the severity of COVID-19. *Epidemiol  
305 Serv Saúde* **2020**; e2020119.
- 306 15. Peixoto VR, Vieira A, Aguiara P, Carvalho C, Thomas D, Abrantes A. Rapid assessment of  
307 the impact of “lockdown” on the COVID-19 epidemic in Portugal. *MedRxiv* **2020**.
- 308 16. [https://www.pharmacytimes.com/ajax/development-of-prep-for-covid-19-could-allow-](https://www.pharmacytimes.com/ajax/development-of-prep-for-covid-19-could-allow-country-to-open-safely-before-a-vaccine-is-available)  
309 [country-to-open-safely-before-a-vaccine-is-available](https://www.pharmacytimes.com/ajax/development-of-prep-for-covid-19-could-allow-country-to-open-safely-before-a-vaccine-is-available)
- 310 17. Gama AFM. HIV infection in men who have sex with men (MSM): risk-taking behaviours  
311 and drivers of increased infection. Universidade Nova de Lisboa [Thesis in tropical  
312 Medicine]. 2019
- 313 18. Yuen KS, Ye ZW, Fung SY, Chan CP, Jin DY. SARS-CoV-2 and COVID-19: The most  
314 important research questions. *Cell Biosci* **2020** 16; 10:40.

- 315 19. Wong NS, Kwan TH, Lee KCK, Lau JYC, Lee SS. Delineation of chemsex patterns of men  
316 who have sex with men in association with their sexual networks and linkage to HIV  
317 prevention. *Int J Drug Policy*. **2020**; 75:102591.
- 318 20. Sanchez TH, Zlotorzynska M, Rai M, Baral SD. Characterizing the Impact of COVID-19 on  
319 Men Who Have Sex with Men Across the United States in April, 2020. *AIDS and Behav*  
320 **2020**; 1-9.
- 321 21. Menezes PL, Garner DM, Valenti VE. Brazil is projected to be the next global COVID-19  
322 pandemic epicenter. *Medrxiv* **2020**.
- 323 22. Sullivan A. Love in the time of coronavirus: COVID-19 changes the game for online dating.  
324 Deutsche Welle. 2020. [https://www.dw.com/en/love-in-the-time-of-coronavirus-covid-19-](https://www.dw.com/en/love-in-the-time-of-coronavirus-covid-19-changes-the-game-for-online-dating/a-52933001)  
325 [changes-the-game-for-online-dating/a-52933001](https://www.dw.com/en/love-in-the-time-of-coronavirus-covid-19-changes-the-game-for-online-dating/a-52933001). Accessed 27 May 2020.
- 326 23. NYC. Sex and COVID-19 Fact Sheet. Available from:  
327 [https://www1.nyc.gov/assets/doh/downloads/pdf/imm/covid-sex-](https://www1.nyc.gov/assets/doh/downloads/pdf/imm/covid-sex-guidance.pdf?utm_source=morning_brew)  
328 [guidance.pdf?utm\\_source=morning\\_brew](https://www1.nyc.gov/assets/doh/downloads/pdf/imm/covid-sex-guidance.pdf?utm_source=morning_brew). Access 27 May 2020.
- 329 24. UNAIDS. Safer sex in the time of COVID-19. Available from:  
330 <https://www.unaids.org/en/resources/covid-blog>, access in 27 may 2020
- 331 25. Cunha CB, Boni RBD, Guimarães MRC, Yanavich C, Veloso VG, Moreira RI, Hoagland B,  
332 Grinsztejn B, Friedman RK. Unprotected sex among men who have sex with men living with  
333 HIV in Brazil: a cross-sectional study in Rio de Janeiro. *BMC Public Health*. 2014;  
334 14(379):1-9.
- 335 26. Poon CM, Wong NS, Kwan TH, Wong HTH, Chan KCW, Lee SS. Changes of sexual risk  
336 behaviors and sexual connections among HIV-positive men who have sex with men along  
337 their HIV care continuum. *PLoS One*. 2018; 13(12):1-14.

- 338 27. Cao B, Wang Y, Wen D et al. A Trial of Lopinavir-Ritonavir in Adults Hospitalized with  
339 Severe Covid-19. *N Engl J Med* **2020**; 382:1787-1799.
- 340 28. Whitfield DL, Kattari SK, Walls NE, Al-Tayyib A. Grindr, Scruff, and on the Hunt:  
341 Predictors of Condomless Anal Sex, Internet Use, and Mobile Application Use Among Men  
342 Who Have Sex with Men. *Am J Mens Health*. **2017**;11(3):775-784.
- 343 29. Yeo C, Sanghvi K, Yeo D: Enteric involvement of coronaviruses: is faecal-oral transmission  
344 of SARS-CoV-2 possible? *Lancet Gastroenterol*. 2020, 5: P335-337. 10.1016/ S2468-  
345 1253(20)30048-0
- 346
- 347
- 348
- 349
- 350
- 351
- 352
- 353



354 Figure 01 Flowchart for data collection

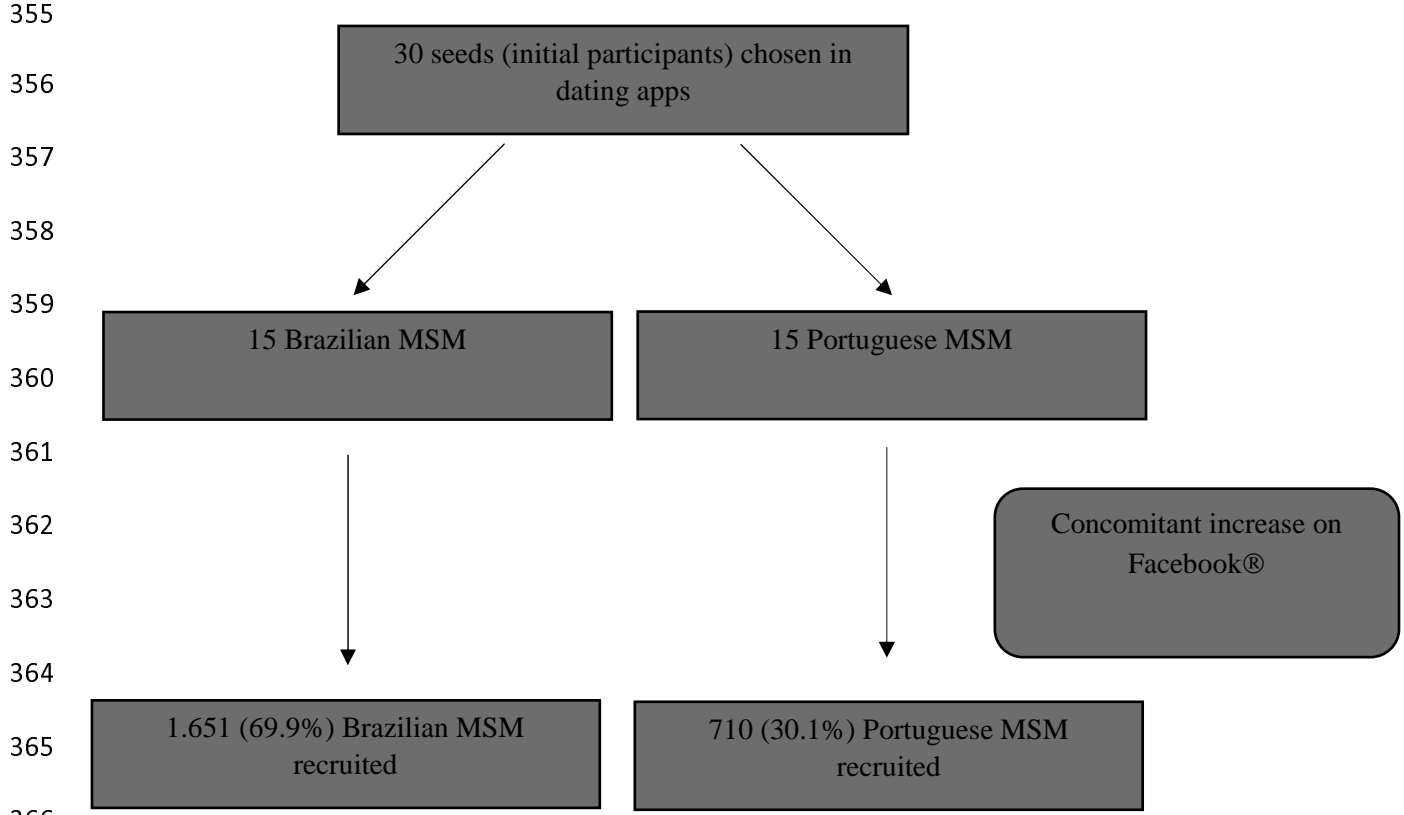

367

368

369

370

371

372

373

374

375

376

377

378 **Table 1.** Characteristics and sexual practices during the COVID-19 shelter in place period, men  
 379 who have sex with men, Brazil and Portugal, 2020.

|                               | <b>Brazil</b>    |          | <b>Portugal</b> |          | <b>Total</b>     |          |
|-------------------------------|------------------|----------|-----------------|----------|------------------|----------|
|                               | <b>(N=1,651)</b> |          | <b>(N=710)</b>  |          | <b>(N=2,361)</b> |          |
| <b>Characteristics</b>        | <b>n</b>         | <b>%</b> | <b>n</b>        | <b>%</b> | <b>n</b>         | <b>%</b> |
| <b>Gender identity</b>        |                  |          |                 |          |                  |          |
| Cisgender man                 | 1637             | 99.2     | 697             | 98.2     | 2334             | 98.9     |
| Transgender man or non-binary | 14               | 0.8      | 13              | 1.8      | 27               | 1.1      |
| <b>Schooling</b>              |                  |          |                 |          |                  |          |
| <9 years                      | 340              | 20.6     | 152             | 21.4     | 492              | 20.8     |
| >9 years                      | 1311             | 79.4     | 558             | 78.6     | 1869             | 79.2     |
| <b>Race/skin color</b>        |                  |          |                 |          |                  |          |
| Caucasian                     | 375              | 22.7     | 575             | 80.9     | 950              | 40.2     |
| Non-Caucasian                 | 1276             | 77.3     | 135             | 19.1     | 1411             | 59.8     |
| <b>Lives in urban area</b>    |                  |          |                 |          |                  |          |
|                               | 1140             | 69.0     | 677             | 95.4     | 1817             | 77.0     |
| <b>Relationship status</b>    |                  |          |                 |          |                  |          |
| Single                        | 1143             | 69.2     | 584             | 82.3     | 1727             | 73.1     |
| Monogamous                    | 480              | 29.1     | 86              | 12.1     | 566              | 24.0     |

|             |    |     |    |     |    |     |
|-------------|----|-----|----|-----|----|-----|
| Polyamorous | 28 | 1.7 | 40 | 5.6 | 68 | 2.9 |
|-------------|----|-----|----|-----|----|-----|

**Self-reported HIV status**

|              |      |      |     |      |      |      |
|--------------|------|------|-----|------|------|------|
| HIV negative | 1285 | 77.8 | 488 | 68.7 | 1773 | 75.1 |
|--------------|------|------|-----|------|------|------|

|              |     |     |    |      |     |      |
|--------------|-----|-----|----|------|-----|------|
| HIV positive | 163 | 9.9 | 86 | 12.1 | 249 | 10.5 |
|--------------|-----|-----|----|------|-----|------|

|               |     |      |     |      |     |      |
|---------------|-----|------|-----|------|-----|------|
| I do not know | 203 | 12.3 | 136 | 19.2 | 339 | 14.4 |
|---------------|-----|------|-----|------|-----|------|

|                            |     |      |     |      |     |    |
|----------------------------|-----|------|-----|------|-----|----|
| <b>Tested for COVID-19</b> | 174 | 10.5 | 110 | 15.5 | 284 | 12 |
|----------------------------|-----|------|-----|------|-----|----|

|                                |    |     |    |     |     |     |
|--------------------------------|----|-----|----|-----|-----|-----|
| <b>Diagnosed with COVID-19</b> | 90 | 5.5 | 13 | 1.8 | 103 | 4.4 |
|--------------------------------|----|-----|----|-----|-----|-----|

**Are you now sheltering in place?**

|    |    |     |    |     |     |     |
|----|----|-----|----|-----|-----|-----|
| No | 74 | 4.5 | 26 | 3.7 | 100 | 4.2 |
|----|----|-----|----|-----|-----|-----|

|           |     |      |     |      |     |      |
|-----------|-----|------|-----|------|-----|------|
| Partially | 405 | 24.5 | 154 | 21.7 | 559 | 23.7 |
|-----------|-----|------|-----|------|-----|------|

|     |      |      |     |      |      |      |
|-----|------|------|-----|------|------|------|
| Yes | 1172 | 71.0 | 530 | 74.6 | 1702 | 72.1 |
|-----|------|------|-----|------|------|------|

**For how long have you been sheltering?**

|              |    |     |    |     |     |     |
|--------------|----|-----|----|-----|-----|-----|
| 1 to 14 days | 60 | 3.6 | 54 | 7.6 | 114 | 4.8 |
|--------------|----|-----|----|-----|-----|-----|

|               |     |      |    |     |     |      |
|---------------|-----|------|----|-----|-----|------|
| 15 to 29 days | 331 | 20.1 | 62 | 8.8 | 393 | 16.7 |
|---------------|-----|------|----|-----|-----|------|

|               |      |      |     |      |      |      |
|---------------|------|------|-----|------|------|------|
| 30 to 45 days | 1035 | 62.7 | 326 | 45.9 | 1361 | 57.6 |
|---------------|------|------|-----|------|------|------|

|                   |     |      |     |      |     |      |
|-------------------|-----|------|-----|------|-----|------|
| More than 45 days | 225 | 13.6 | 268 | 37.7 | 493 | 20.9 |
|-------------------|-----|------|-----|------|-----|------|

**How would you rate the impact that**

**sheltering has had on your life?**

|                |     |      |     |      |      |      |
|----------------|-----|------|-----|------|------|------|
| Low impact     | 215 | 13.0 | 70  | 9.9  | 285  | 12.1 |
| Average impact | 643 | 38.9 | 292 | 41.1 | 935  | 39.6 |
| High impact    | 793 | 48.0 | 348 | 49.0 | 1141 | 48.3 |

**Usual type of sex partner**

|                        |      |      |     |      |      |      |
|------------------------|------|------|-----|------|------|------|
| Casual                 | 1155 | 70.0 | 413 | 58.2 | 1568 | 66.4 |
| Steady                 | 291  | 17.6 | 40  | 5.6  | 331  | 14.0 |
| Both casual and steady | 205  | 12.4 | 257 | 36.2 | 462  | 19.6 |

**Lives with sex partner**

|     |      |     |      |     |      |
|-----|------|-----|------|-----|------|
| 236 | 14.3 | 109 | 15.4 | 345 | 14.6 |
|-----|------|-----|------|-----|------|

**Usual ways respondent finds sex partners before period of sheltering**

|                                         |      |      |     |      |      |      |
|-----------------------------------------|------|------|-----|------|------|------|
| Dating apps                             | 1285 | 77.8 | 544 | 76.6 | 1829 | 77.5 |
| Facebook, Twitter, or Instagram         | 560  | 33.9 | 286 | 40.3 | 846  | 35.8 |
| Other sites                             | 446  | 27.0 | 173 | 24.4 | 619  | 26.2 |
| Bars, clubs, bathhouses, cruising areas | 72   | 4.4  | 25  | 3.5  | 97   | 4.1  |
| Does not search for partners            | 292  | 17.7 | 98  | 13.8 | 390  | 16.5 |

**Decreased number of sexual partners during**

|      |      |     |      |      |      |
|------|------|-----|------|------|------|
| 1253 | 75.9 | 515 | 72.5 | 1768 | 74.8 |
|------|------|-----|------|------|------|

## sheltering

### In this sheltering period, would you say that...

#### Your sexual frequency

|                |      |      |     |      |      |      |
|----------------|------|------|-----|------|------|------|
| Decreased      | 1188 | 72.0 | 615 | 86.6 | 1803 | 76.4 |
| Did not change | 364  | 22.0 | 66  | 9.3  | 430  | 18.2 |
| Increased      | 99   | 6.0  | 29  | 4.1  | 128  | 5.4  |

#### Your interaction with social media

|                |      |      |     |      |      |      |
|----------------|------|------|-----|------|------|------|
| Decreased      | 117  | 7.1  | 248 | 34.9 | 365  | 15.5 |
| Did not change | 357  | 21.6 | 136 | 19.2 | 493  | 20.9 |
| Increased      | 1177 | 71.3 | 326 | 45.9 | 1503 | 63.6 |

#### Your alcohol consumption

|                |     |      |     |      |      |      |
|----------------|-----|------|-----|------|------|------|
| Decreased      | 705 | 42.7 | 384 | 54.1 | 1089 | 46.1 |
| Did not change | 608 | 36.8 | 212 | 29.9 | 820  | 34.7 |
| Increased      | 338 | 20.5 | 114 | 16.0 | 452  | 19.2 |

#### During sheltering, the respondent

|                       |     |      |     |      |      |      |
|-----------------------|-----|------|-----|------|------|------|
| Had casual sex        | 875 | 53.0 | 377 | 53.1 | 1252 | 53.0 |
| Sought to pay for sex | 63  | 3.8  | 9   | 1.3  | 72   | 3.0  |

|                                                     |     |      |     |      |     |      |
|-----------------------------------------------------|-----|------|-----|------|-----|------|
| Had sex with 2 or more people at the same time      | 259 | 15.7 | 113 | 15.9 | 372 | 15.8 |
| Had sex under the influence of drugs or alcohol     | 777 | 47.1 | 143 | 20.1 | 920 | 39.0 |
| Had unprotected anal sex with a new/casual partner. | 576 | 34.9 | 142 | 20.0 | 718 | 30.4 |

**To protect from COVID-19, the respondent**

|                                                                                   |     |      |     |      |     |      |
|-----------------------------------------------------------------------------------|-----|------|-----|------|-----|------|
| Took general/basic protective measures (e.g., using face mask and hand sanitizer) | 423 | 25.6 | 187 | 26.3 | 610 | 25.8 |
| Asked if the partner was sheltering                                               | 513 | 31.1 | 212 | 29.9 | 725 | 30.7 |
| Asked if the partner had symptoms                                                 | 452 | 27.4 | 197 | 27.7 | 649 | 27.5 |
| Avoided kissing during sex                                                        | 219 | 13.3 | 164 | 23.1 | 383 | 16.2 |
| Washed hands with soap and water for at least 20 seconds before and after sex     | 450 | 27.3 | 202 | 28.5 | 652 | 27.6 |
| Cleaned the place where they had sex before and after sex                         | 209 | 12.7 | 136 | 19.2 | 345 | 14.6 |
| Used PrEP/Truvada                                                                 | 191 | 11.6 | 110 | 15.5 | 301 | 12.7 |
| Used a condom for anal sex                                                        | 403 | 24.4 | 114 | 16.1 | 517 | 21.9 |
| Did not adopt any strategy                                                        | 610 | 36.9 | 247 | 34.8 | 857 | 36.3 |



382 **Table 2.** Factors associated with having casual sex during the COVID-19 shelter in place period,  
 383 men who have sex with men, Brazil and Portugal, 2020.

384

| Factors                                                          | Categories     | OR   | 95%CI      | aOR | 95%CI     |
|------------------------------------------------------------------|----------------|------|------------|-----|-----------|
| <b>Brazil</b>                                                    |                |      |            |     |           |
| <b>Sought to pay for sex</b>                                     |                |      |            |     |           |
|                                                                  | <i>No</i>      | 1    |            |     |           |
|                                                                  | <i>Yes</i>     | 2.7  | 1.5-4.8    | 0.4 | 0.2 - 1.1 |
| <b>Sex with <math>\geq 2</math> at the same time (group sex)</b> |                |      |            |     |           |
|                                                                  | <i>No</i>      | 1    |            |     |           |
|                                                                  | <i>Yes</i>     | 10.0 | 6.6 - 15.1 | 2,1 | 1,3 - 3,4 |
| <b>Live in urban area</b>                                        |                |      |            |     |           |
|                                                                  | <i>No</i>      | 1    |            |     |           |
|                                                                  | <i>Yes</i>     | 1,4  | 1,1 – 1,7  | 1,6 | 1,1-2,2   |
| <b>Self-reported impact of sheltering on daily life:</b>         |                |      |            |     |           |
|                                                                  | <i>Low</i>     | 1    |            |     |           |
|                                                                  | <i>Average</i> | 1.2  | 0.9 -1.5   | 2,2 | 1.5 - 3.2 |
|                                                                  | <i>High</i>    | 1.1  | 0.8 - 1.4  | 3.0 | 1.1 - 8.3 |



**Type of sex partner(s) usually:**

|                                  |     |           |     |           |
|----------------------------------|-----|-----------|-----|-----------|
| <i>Steady partner</i>            | 1   |           |     |           |
| <i>Casual and steady partner</i> | 3.3 | 2.2 - 4.8 | 1,6 | 0.9 - 2.8 |
| <i>Casual partner</i>            | 1.5 | 1.2 - 2.0 | 2,5 | 1.8 - 3.5 |

**Did you use a condom during sex?**

|            |     |           |     |           |
|------------|-----|-----------|-----|-----------|
| <i>No</i>  | 1   |           |     |           |
| <i>Yes</i> | 0.4 | 0.3 - 0.5 | 0,6 | 0,4 – 0,9 |

**Decrease in the number of partners during sheltering**

|            |      |             |     |            |
|------------|------|-------------|-----|------------|
| <i>Yes</i> | 1    |             |     |            |
| <i>No</i>  | 21.3 | 15.0 - 30.4 | 6.5 | 4.2 – 10.0 |

**Portugal**

**Usually used Facebook to find partners**

|            |     |           |     |         |
|------------|-----|-----------|-----|---------|
| <i>No</i>  | 1   |           |     |         |
| <i>Yes</i> | 3.0 | 2.2 – 4.2 | 4,6 | 3.0-7.2 |

**Did not seek partners**

|           |   |  |  |  |
|-----------|---|--|--|--|
| <i>No</i> | 1 |  |  |  |
|-----------|---|--|--|--|

|            |     |           |     |           |
|------------|-----|-----------|-----|-----------|
| <i>Yes</i> | 0.5 | 0.4 - 0.7 | 0.3 | 0.1 - 0.5 |
|------------|-----|-----------|-----|-----------|

**For how long have you been in isolation?**

|            |   |  |  |  |
|------------|---|--|--|--|
| 15-29 days | 1 |  |  |  |
|------------|---|--|--|--|

|            |     |           |     |           |
|------------|-----|-----------|-----|-----------|
| 30-45 days | 0.5 | 0.3 - 0.8 | 0.2 | 0.1 - 0.4 |
|------------|-----|-----------|-----|-----------|

|          |     |           |     |           |
|----------|-----|-----------|-----|-----------|
| >45 days | 0.8 | 0.4 - 1.4 | 0.4 | 0.2 - 0.8 |
|----------|-----|-----------|-----|-----------|

|                         |     |           |     |           |
|-------------------------|-----|-----------|-----|-----------|
| <i>Not in isolation</i> | 0.5 | 0.3 - 1.1 | 0.2 | 0.1 - 0.8 |
|-------------------------|-----|-----------|-----|-----------|

**Decrease in the number of partners during sheltering**

|            |   |  |  |  |
|------------|---|--|--|--|
| <i>Yes</i> | 1 |  |  |  |
|------------|---|--|--|--|

|           |     |           |     |           |
|-----------|-----|-----------|-----|-----------|
| <i>No</i> | 1.2 | 0.9 - 1.6 | 3.8 | 2.9 - 5.9 |
|-----------|-----|-----------|-----|-----------|

**Usually found partners at bars, clubs, bathhouses, etc**

|           |   |  |  |  |
|-----------|---|--|--|--|
| <i>No</i> | 1 |  |  |  |
|-----------|---|--|--|--|

|            |     |           |     |           |
|------------|-----|-----------|-----|-----------|
| <i>Yes</i> | 2.3 | 1.6 - 3.3 | 5.4 | 3.2 - 8.9 |
|------------|-----|-----------|-----|-----------|

**Impact of isolation on daily life:**

|            |   |  |  |  |
|------------|---|--|--|--|
| <i>Low</i> | 1 |  |  |  |
|------------|---|--|--|--|

|                |     |           |     |           |
|----------------|-----|-----------|-----|-----------|
| <i>Average</i> | 0.8 | 0.5 - 1.4 | 0.7 | 0.3 - 1.7 |
|----------------|-----|-----------|-----|-----------|

|             |     |           |     |           |
|-------------|-----|-----------|-----|-----------|
| <i>High</i> | 3.1 | 1.9 - 5.4 | 3.0 | 1.3 - 6.7 |
|-------------|-----|-----------|-----|-----------|

### Self-reported HIV status

|                      |      |            |      |            |
|----------------------|------|------------|------|------------|
| <i>Negative</i>      | 1    |            |      |            |
| <i>Positive</i>      | 10.4 | 4.9 - 22.0 | 11.7 | 4.7 - 29.2 |
| <i>Does not know</i> | 0.9  | 0.8 - 1.1  | 1.4  | 0.7 - 2.3  |
